# Supplementary material
Source: HighWire-hosted journal article supplement (https://jech.bmj.com/content/77/3/133)
Supplement: inline-supplementary-material-1 [file inline-supplementary-material-1.pdf]

Table S1: Number of missing data before and after the free delivery intervention in Kaya and the national subsidy for deliveries in Zorgho.

|                                                       | Kaya Health District |       |       |       | Zorgho Health District |       |       |       |       |
|-------------------------------------------------------|----------------------|-------|-------|-------|------------------------|-------|-------|-------|-------|
|                                                       | Deliveries           | ANC1  | ANC2  | ANC3  | Deliveries             | ANC1  | ANC2  | ANC3  | ANC4  |
| Number of health facilities                           | 41                   | 41    | 41    | 41    | 48                     | 48    | 48    | 48    | 48    |
| Number of health facilities without missing data      | 37                   | 18    | 25    | 23    | 45                     | 22    | 26    | 22    | 15    |
| Number of observations expected in pre-policy period  | 564                  | 564   | 564   | 564   | 767                    | 767   | 767   | 767   | 767   |
| Number of missing Data in pre-policy period           | 01                   | 07    | 08    | 05    | 01                     | 04    | 06    | 05    | 05    |
| Percentage of missing data in pre-policy period       | 0.2                  | 1.2   | 1.4   | 0.9   | 0.1                    | 0.5   | 0.8   | 0.7   | 0.7   |
| Number of observations expected in post-policy period | 1,673                | 1,673 | 1,673 | 1,673 | 3,450                  | 3,450 | 3,450 | 3,450 | 3,450 |
| Number of missing Data in post-policy period          | 06                   | 34    | 23    | 22    | 02                     | 45    | 32    | 41    | 67    |
| Percentage of missing data in post-policy period      | 0.4                  | 2.0   | 1.4   | 1.3   | 0.06                   | 1.3   | 0.9   | 1.2   | 1.9   |
| Total number of observations expected                 | 2,237                | 2,237 | 2,237 | 2,237 | 4,217                  | 4,217 | 4,217 | 4,217 | 4,217 |
| Total number of missing Data                          | 07                   | 41    | 31    | 27    | 03                     | 49    | 38    | 46    | 72    |
| Percentage of missing Data in study period            | 0.3                  | 1.8   | 1.4   | 1.2   | 0.07                   | 1.2   | 0.9   | 1.0   | 1.7   |

NB: Missing data included outliers excluded for analysis.
