# Supplementary material
Source: HighWire-hosted journal article supplement (https://jech.bmj.com/content/77/3/133)
Supplement: inline-supplementary-material-2 [file inline-supplementary-material-2.pdf]

**Table S2.** Estimated regression coefficients and standard errors (SE) from a spline linear regression: The effects of two cost-reduction interventions on facility-based deliveries in Burkina Faso with different nonequivalent dependent variables as control outcomes.

| Coefficients                                           | Deliveries      | ANC1            | ANC2            | ANC3            | ANC4            |
|--------------------------------------------------------|-----------------|-----------------|-----------------|-----------------|-----------------|
| <b>Kaya Health District</b>                            |                 |                 |                 |                 |                 |
| Baseline level (Intercept)                             | 9.66*** (2.23)  | 33.19*** (3.62) | 23.63*** (2.66) | 10.77*** (1.97) |                 |
| Pre-intervention trend (January 2006 to May 2007)      | 0.47*** (0.06)  | 0.47*** (0.06)  | 0.47*** (0.06)  | 0.47*** (0.06)  |                 |
| Immediate intervention effect                          | -0.32 (0.95)    | 10.28*** (2.60) | 5.04*** (1.52)  | 2.77 (1.81)     |                 |
| Post-intervention trends                               |                 |                 |                 |                 |                 |
| June to December 2007 trend                            | 0.75*** (0.18)  | -1.64*** (0.31) | -0.48* (0.21)   | -0.03 (0.23)    |                 |
| January 2008 to December 2009 trend                    | 0.19*** (0.03)  | 0.19*** (0.03)  | 0.19*** (0.03)  | 0.19*** (0.03)  |                 |
| January to December 2010 trend                         | 0.06 (0.08)     | -0.69*** (0.14) | -0.63*** (0.13) | -0.59*** (0.10) |                 |
| <b>Zorgho Health District</b>                          |                 |                 |                 |                 |                 |
| Baseline level (Intercept)                             | 11.43*** (1.70) | 26.19*** (1.74) | 19.76*** (1.73) | 9.24*** (1.71)  | 1.09 (1.72)     |
| Pre-intervention trend (January 2005 to December 2006) | 0.16*** (0.02)  | 0.16*** (0.02)  | 0.16*** (0.02)  | 0.16*** (0.02)  | 0.16*** (0.02)  |
| Immediate intervention effect                          | -0.13 (0.59)    | -0.13 (0.59)    | -0.13 (0.59)    | -0.13 (0.59)    | -0.13 (0.59)    |
| Post-intervention trends                               |                 |                 |                 |                 |                 |
| January to December 2007 trend                         | 0.60*** (0.07)  | 0.08 (0.09)     | 0.29** (0.08)   | 0.40*** (0.08)  | 0.14 (0.08)     |
| January to December 2008 trend                         | -0.04 (0.07)    | -0.04 (0.09)    | -0.007 (0.08)   | 0.15* (0.07)    | 0.30*** (0.08)  |
| January to December 2009 trend                         | 0.38*** (0.06)  | 0.002 (0.07)    | 0.06 (0.07)     | 0.18** (0.06)   | 0.24*** (0.07)  |
| January to December 2010 trend                         | -0.23*** (0.03) | -0.23*** (0.03) | -0.23*** (0.03) | -0.23*** (0.03) | -0.23*** (0.03) |
| January to December 2011 trend                         | 0.25*** (0.03)  | 0.25*** (0.03)  | 0.25*** (0.03)  | 0.25*** (0.03)  | 0.25*** (0.03)  |
| January 2012 to December 2013 trend                    | -0.09*** (0.02) | -0.09*** (0.02) | -0.09*** (0.02) | -0.09*** (0.02) | -0.09*** (0.02) |

ANC1 (first ANC visit), ANC2 (second ANC visit), ANC3 (third ANC visit), ANC4 (fourth ANC visit). The time trend is a monthly trend.

Data are shown as estimates (SEs). \*p < 0.05, \*\*p < 0.01 & \*\*\*p < 0.001
